# Supplementary material for: Clinically relevant enhancement of human sperm motility using compounds with reported phosphodiesterase inhibitor activity
Source: PubMed Central journal article supplement (PMC4481575; doi:10.1093/humrep/deu196), 2014-08-14
Supplement: supp_deu196_deu196supp_fig1.pdf [file supp_deu196_deu196supp_fig1.pdf]

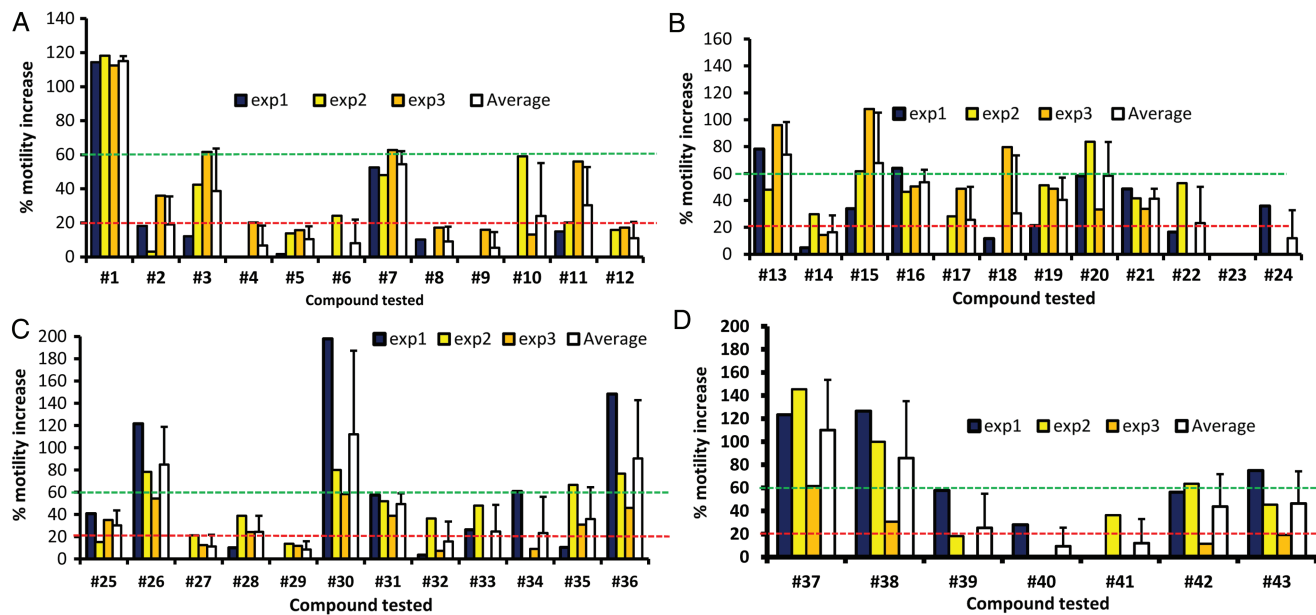

**Supplementary Figure S1** Effect(s) of compound(s) on sperm motility: spermatozoa were treated for 20 min at 37°C with 100  $\mu$ M of compound. (A) Compound tested (#1–#12). (B) Compound tested (#13–#24). (C) Compound tested (#25–#36). (D) Compound tested (#37–#43). A 100% increase equals a 2-fold increase in motility compared with 1% DMSO negative control (i.e. if DMSO = 15%, treatment = 30%);  $n = 3$  (three separate analysis of pooled sample), mean  $\pm$  SD. The green line indicates threshold for strong responder, while the red line is the threshold for background. Compounds between the green and red lines indicate mild responder.
