# Supplementary material for: Clinically relevant enhancement of human sperm motility using compounds with reported phosphodiesterase inhibitor activity
Source: PubMed Central journal article supplement (PMC4481575; doi:10.1093/humrep/deu196), 2014-08-14
Supplement: supp_deu196_deu196supp_fig2.pdf [file supp_deu196_deu196supp_fig2.pdf]

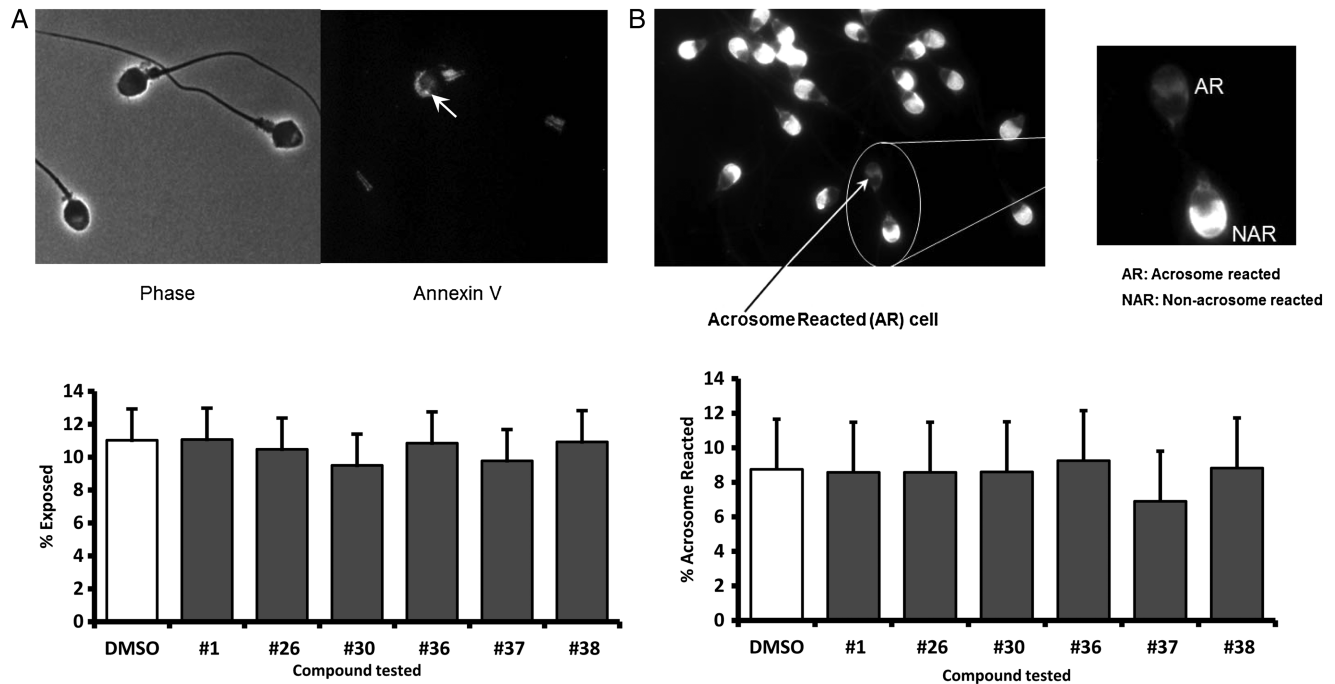

**Supplementary Figure S2** Effect(s) of selected compound on the expression of phosphatidylserine (PS) and percentage of acrosome-reacted spermatozoa: spermatozoa (40% fraction: poor motility population) were treated for 20 min at 37°C with 100  $\mu$ M of compound. **(A)** Sperm cells were labelled with fluorescein isothiocyanate-labelled annexin V/propidium iodide (PI). The arrow shows cell with no externalization of phosphatidylserine ( $n = 4$ , four samples from four individuals;  $P = 0.6$ , mean  $\pm$  SEM). **(B)** Permeabilized spermatozoa were labelled with *Pisum sativum lectin* ( $n = 4$  four samples from four individuals;  $P = 0.6$ , mean  $\pm$  SEM). Images represent typical image used for criteria for scoring. Minimum of 200 cells counted. Magnification  $\times 400$ .
