# Supplementary material for: Clinically relevant enhancement of human sperm motility using compounds with reported phosphodiesterase inhibitor activity
Source: PubMed Central journal article supplement (PMC4481575; doi:10.1093/humrep/deu196), 2014-08-14
Supplement: supp_deu196_deu196supp_fig3.pdf [file supp_deu196_deu196supp_fig3.pdf]

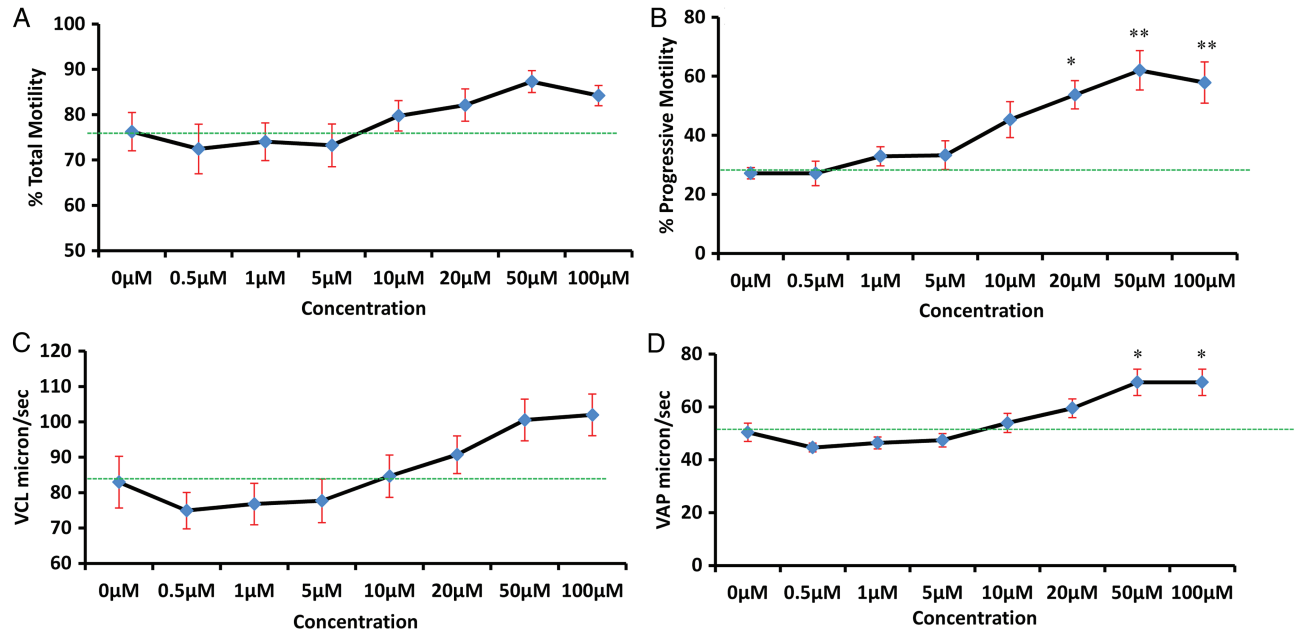

**Supplementary Figure S3** Determination of minimum effective concentration of compound #26 on human sperm: The population of highly motile human spermatozoa was isolated by direct swim-up. Cells were incubated in NCM at 37°C for 1 h; they were then treated with compound #26 (final concentrations of 100, 50, 20, 10, 5, 1 and 0.5 μM) or without compound (NCM, 0 μM: non-capacitating media) and left to incubate for 20 min at 37°C **(A)** Percentage total motility. **(B)** Percentage progressive motility. **(C)** Curvilinear velocity. **(D)** Average path velocity  $n = 4$  (four different samples from two individuals), mean  $\pm$  SEM; one-way ANOVA (Tukey's honest significant difference), \* $P < 0.05$  and \*\* $P < 0.01$ . The green line indicates 'cut off' represented by average value of control sample (NCM).

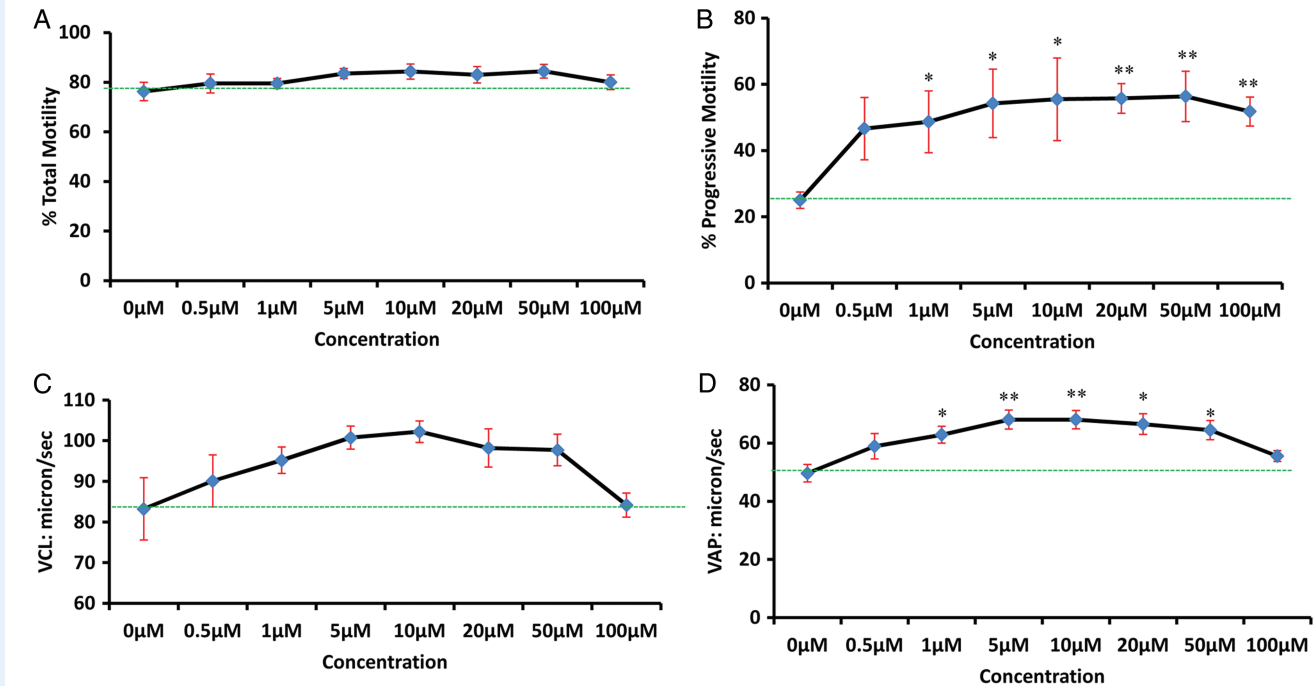

**Supplementary Figure S4** Determination of minimum effective concentration of compound #37 on human sperm: The population of highly motile human spermatozoa was isolated by direct swim-up. Cells were incubated at 37°C for 1 h; they were then treated with compound #37 (final concentrations of 100, 50, 20, 10, 5, 1 and 0.5 μM) or without compound (NCM, 0 μM: non-capacitating media) and left to incubate for 20 min at 37°C (**A**) Percentage total motility. (**B**) Percentage progressive motility. (**C**) Curvilinear velocity. (**D**) Average path velocity,  $n = 4$  (four different samples from two individuals), mean  $\pm$  SEM; one-way ANOVA (Tukey's honest significant difference), \* $P < 0.05$  and \*\* $P < 0.01$ . The green line indicates 'cut off' represented by average value of control sample (NCM).

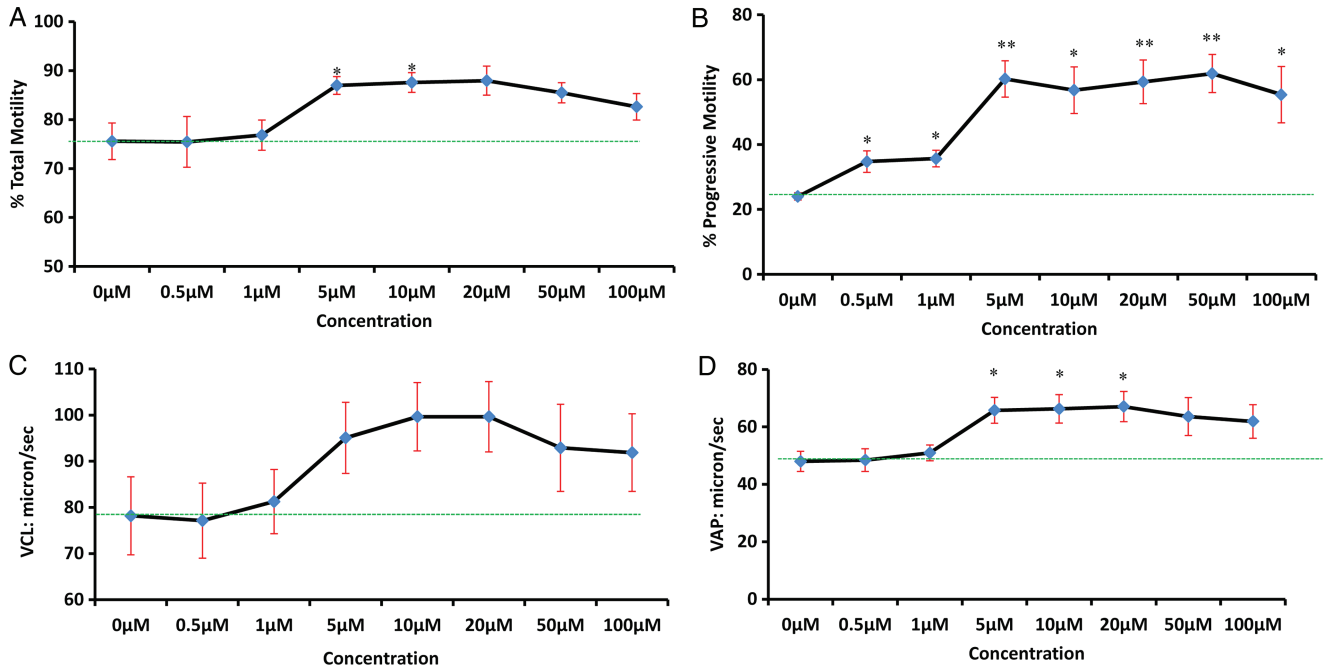

**Supplementary Figure S5** Determination of minimum effective concentration of compound #38 on human sperm: The population of highly motile human spermatozoa was isolated by direct swim-up. Cells were incubated at 37°C for 1 h; they were then treated with compound #38 (final concentrations of 100, 50, 20, 10, 5, 1 and 0.5 μM) or without compound (NCM, 0 μM: non-capacitating media) and left to incubate for 20 min at 37°C **(A)** Percentage total motility. **(B)** Percentage progressive motility. **(C)** Curvilinear velocity. **(D)** Average path velocity,  $n = 3$  (three different sample from two individuals), mean  $\pm$  SEM; one-way ANOVA (Tukey's honest significant difference), \* $P < 0.05$  and \*\* $P < 0.01$ . The green line indicates 'cut off' represented by average value of control sample (NCM).
