# Supplementary material for: Clinically relevant enhancement of human sperm motility using compounds with reported phosphodiesterase inhibitor activity
Source: PubMed Central journal article supplement (PMC4481575; doi:10.1093/humrep/deu196), 2014-08-14
Supplement: supp_deu196_deu196supp_table1.pdf [file supp_deu196_deu196supp_table1.pdf]

**Supplementary Table S1** List of compounds screened during Phase I.

| Tag # | Product name             | Tag # | Product name            |
|-------|--------------------------|-------|-------------------------|
| 1     | Dipyridamole             | 23    | A-7 hydrochloride       |
| 2     | (R)-(-)-Rolipram         | 24    | Zaprinast               |
| 3     | Rolipram                 | 25    | Cilostazol              |
| 4     | Vinpocetine              | 26    | Ibudilast               |
| 5     | CGH 2466 dihydrochloride | 27    | Irsogladine maleate     |
| 6     | W-7 hydrochloride        | 28    | Caffeine                |
| 7     | IBMX                     | 29    | CP 80633                |
| 8     | Milrinone                | 30    | MMPX (8-MeO-IBMX)       |
| 9     | BRL 50481                | 31    | Siguazodan              |
| 10    | Mesopram                 | 32    | EHNA hydrochloride      |
| 11    | Cilostamide              | 33    | Theophylline            |
| 12    | Pentoxifylline           | 34    | YM 976                  |
| 13    | T 0156 hydrochloride     | 35    | ICI 63197               |
| 14    | (S)-(+)-Rolipram         | 36    | Etazolate hydrochloride |
| 15    | Zardaverine              | 37    | Papaverine              |
| 16    | RS 25344 hydrochloride   | 38    | Tofisopam               |
| 17    | Anagrelide hydrochloride | 39    | Nicardipine             |
| 18    | MY-5445                  | 40    | Nimodipine              |
| 19    | Ro 20-1724               | 41    | Tadalafil               |
| 20    | Sildenafil citrate       | 42    | Bay-73-6691             |
| 21    | Trequinsin hydrochloride | 43    | Bay-60-7550             |
| 22    | W-9 hydrochloride        |       |                         |
